# Supplementary material for: Novel coordinating motifs for lanthanide(iii) ions based on 5-(2-pyridyl)tetrazole and 5-(2-pyridyl-1-oxide)tetrazole. Potential new contrast agents
Source: Royal Society of Chemistry journal article supplement (doi:10.1039/b401919a), 2004-01-01
Supplement: b401919a.doc [file b401919a.doc]

**SUPPORTING INFORMATION**

Novel coordinating motifs for lanthanide (III) ions based on 5-(2-pyridyl)-tetrazole and 5-(2-pyridyl-1-oxide)tetrazole. Potential new contrast agents

Antonio Facchetti,**a* Alessandro Abbotto,*b* Luca Beverina,*b* Silvia Bradamante,*c* Palma Mariani,*d* Charlotte L. Stern,*a* Tobin J. Marks,*a* Alberto Vacca,*d* Giorgio A. Pagani**b*

a Department of Chemistry, Northwestern University, 2145 Sheridan Road, 60208, Evanston, IL, USA

b Department of Materials Science, University of Milano-Bicocca, Via Cozzi 53, I-20125, Milano, Italy

c CNR-Institute of Molecular Science and Technologies, Via Golgi 19, I-20133, Milano, Italy

d Department of Chemistry, Via della Lastruccia 3, I 50019, Sesto Fiorentino, Italy

**Table S1** Analytical data of Zn(II) and Ln(III) complexes of **1 - 4**.

| L**-** | Mn+ | % | Elemental Analysis (%)*a* | | | H2O*b* |
| --- | --- | --- | --- | --- | --- | --- |
| C | H | N |
| **1-** | Zn | 76 | 36.60 (36.52) | 3.08 (3.00) | 35.58 (35.45) | 2 |
|  | Eu | 75 | 30.55 (30.41) | 3.57 (3.41) | 29.70 (29.65) | 6.5 |
|  | Dy | 49 | 29.74 (29.76) | 3.61 (3.47) | 28.90 (28.78) | 7 |
|  | Gd | 73 | 30.33 (30.14) | 3.54 (3.41) | 2948 (29.53) | 6.5 |
| **2-** | Zn | 61 | 33.85 (34.22) | 2.84 (2.24) | 32.91 (32.57) | 2 |
|  | Eu | 47 | 30.82 (31.08) | 2.73 (2.61) | 29.95 (29.77) | 3.5 |
|  | Dy | 59 | 30.36 (30.55) | 2.69 (2.49) | 29.51 (29.25) | 3.5 |
|  | Gd | 48 | 29.83 (29.49) | 2.92 (2.43) | 28.99 (28.79) | 4.5 |
| **3-** | Zn | 84 | 34.32 (34.14) | 4.90 (4.56) | 24.01 (24.20) | 0 |
|  | Gd | 30 | 32.48 (32.19) | 4.64 (4.09) | 22.74 (25.01) | 9 |
| **4-** | Zn | 86 | 42.85 (42.55) | 4.31 (4.77) | 29.98 (29.81) | 0 |
|  | Gd | 46 | 31.88 (31.54) | 4.28 (3.63) | 22.31 (22.31) | 7.5 |

*a*Theoretical values are reposted in parenthesis. *b* From K-F analysis.


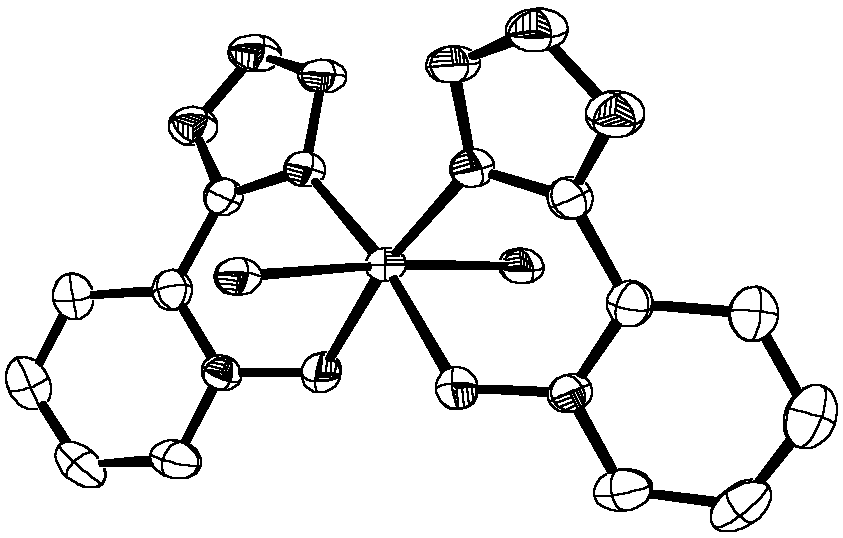


Zn(**2-**)2

**Figure S2.** Crystal structure of chelate Zn(2**-**).

# E.M.F. Measurements

# *Materials*. – Deionised water with a specific resistance larger than 15 M cm was doubly distilled in quartz still and cooled under a current of nitrogen. (Me4N)NO3 (Fluka, 97%) was purchased and used as received. 0.1 mol dm-3 HCl solution was purchased by Fluka and standardized against tris(hydroxymethyl)amino methane (Aldrich ACS reagent). GdCl3 · 6 H2O (Aldrich, 99%) was used to prepare an approximately 0.2 mol dm-3 stock solution using CO2 free water; the solution was standardized by gravimetric determination of the chloride content. A 0.1 mol dm-3 (Me4N)OH aqueous solution, prepared by dilution of a commercial product (Merck, 10% aqueous solution) with CO2 free water, was standardized by potentiometric titration against standard HCl 0.1 mol dm‑3.

# *Experimental Details*. – Potentiometric titrations were carried out using a Metrohm 713 pH/mV meter, a Hamilton Liq-glass combined glass–Ag/AgCl pH electrode. The solution in the titration vessel was stirred magnetically. A stream of argon, presaturated with water vapour by bubbling it through a 0.10 mol dm-3 (Me4N)NO3 solution, was blown over the surface of the solution. The entire cell was thermostatted at 25.0 *±* 0.5 °C. The potentiometric cell was calibrated in terms of hydrogen ion concentrations using Gran's method [1]. Solutions containing variable quantities of ligand and hydrochloric acid (for the deprotonation experiments) and ligand, hydrochloric acid and GdCl3 (for the complex formation experiments) were titrated with the (Me4N)OH solution dispensed from a Metrohm 765 digital burette. The equilibrium was attained within few minutes, except in the case of the complex formation experiments above pH ~4.5, owing to precipitation of insoluble products. The ionic strength was always adjusted to 0.10 mol dm-3 by adding solid (Me4N)NO3. The potentiometric measurements were performed in full automated mode under the control of the PASAT program [2], running on a PS/2 personal computer. The ionic product of water in 0.10 mol dm-3 (Me4N)NO3 solution at 25 °C was determined as p*K*w = 13.83 ± 0.01.

*Calculations*. – Analysis of the potentiometric data was carried out using the computer program HYPERQUAD [3]. The HYPERQUAD results are summarized in the following tables.

[1]G. Gran, *Analyst* 77 (1952) 661.

[2]M. Fontanelli and M. Micheloni, I Spanish-Italian Congress on Thermodynamics of Metal Complexes, Peniscola, Spain, 3-6 june 1990, p. 41-43.

[3]P. Gans, A. Sabatini and A. Vacca, *Talanta* 43 (1996) 1739-1753.

**Hyperquad results (*T* = 298 K, *I* = 0.10 mol dm-3, (Me4N)NO3)**

Compound **1** 5-(2-pyridyl)tetrazole  HL

Protonation constants

| reaction | log *K* | Notes |
| --- | --- | --- |
| L- + H+  HL | 4.35(1) | p*K*a of HL |
| L- + 2 H+  H2L+ | 5.62(7) |  |
| HL + H+  H2L+ | 1.27(3) | *K*b  of HL |

Complex formation constants

| reaction | log *K* | Notes |
| --- | --- | --- |
| Gd3+ + L-  GdL2+ | 2.45(3) |  |
| Gd3+ + 2 L-  GdL2+ | 4.6(1) | *cumulative* |
| Gd3+ + 3 L-  GdL3 | 6.7(2) | *cumulative* |
| GdL2+ + L-  GdL2+ | 2.17(5) | *stepwise* |
| GdL2+ + L-  GdL3 | 2.1(1) | *stepwise* |

Compound **2** 5-(2-pyridyl-1-oxide)tetrazole  HL

Protonation constants

| reaction | log *K* | Notes |
| --- | --- | --- |
| L- + H+  HL | 3.84(1) | p*K*a of HL |
| L- + 2 H+  H2L+ | 5.18(3) |  |
| HL + H+  H2L+ | 1.34(1) | *K*b  of HL |

Complex formation constants

| reaction | log *K* | Notes |
| --- | --- | --- |
| Gd3+ + L-  GdL2+ | 3.29(4) |  |
| Gd3+ + 2 L-  GdL2+ | 5.7(1) | *cumulative* |
| Gd3+ + 3 L-  GdL3 | 8.66(7) | *cumulative* |
| GdL2+ + L-  GdL2+ | 2.37(5) | *stepwise* |
| GdL2+ + L-  GdL3 | 3.00(7) | *stepwise* |


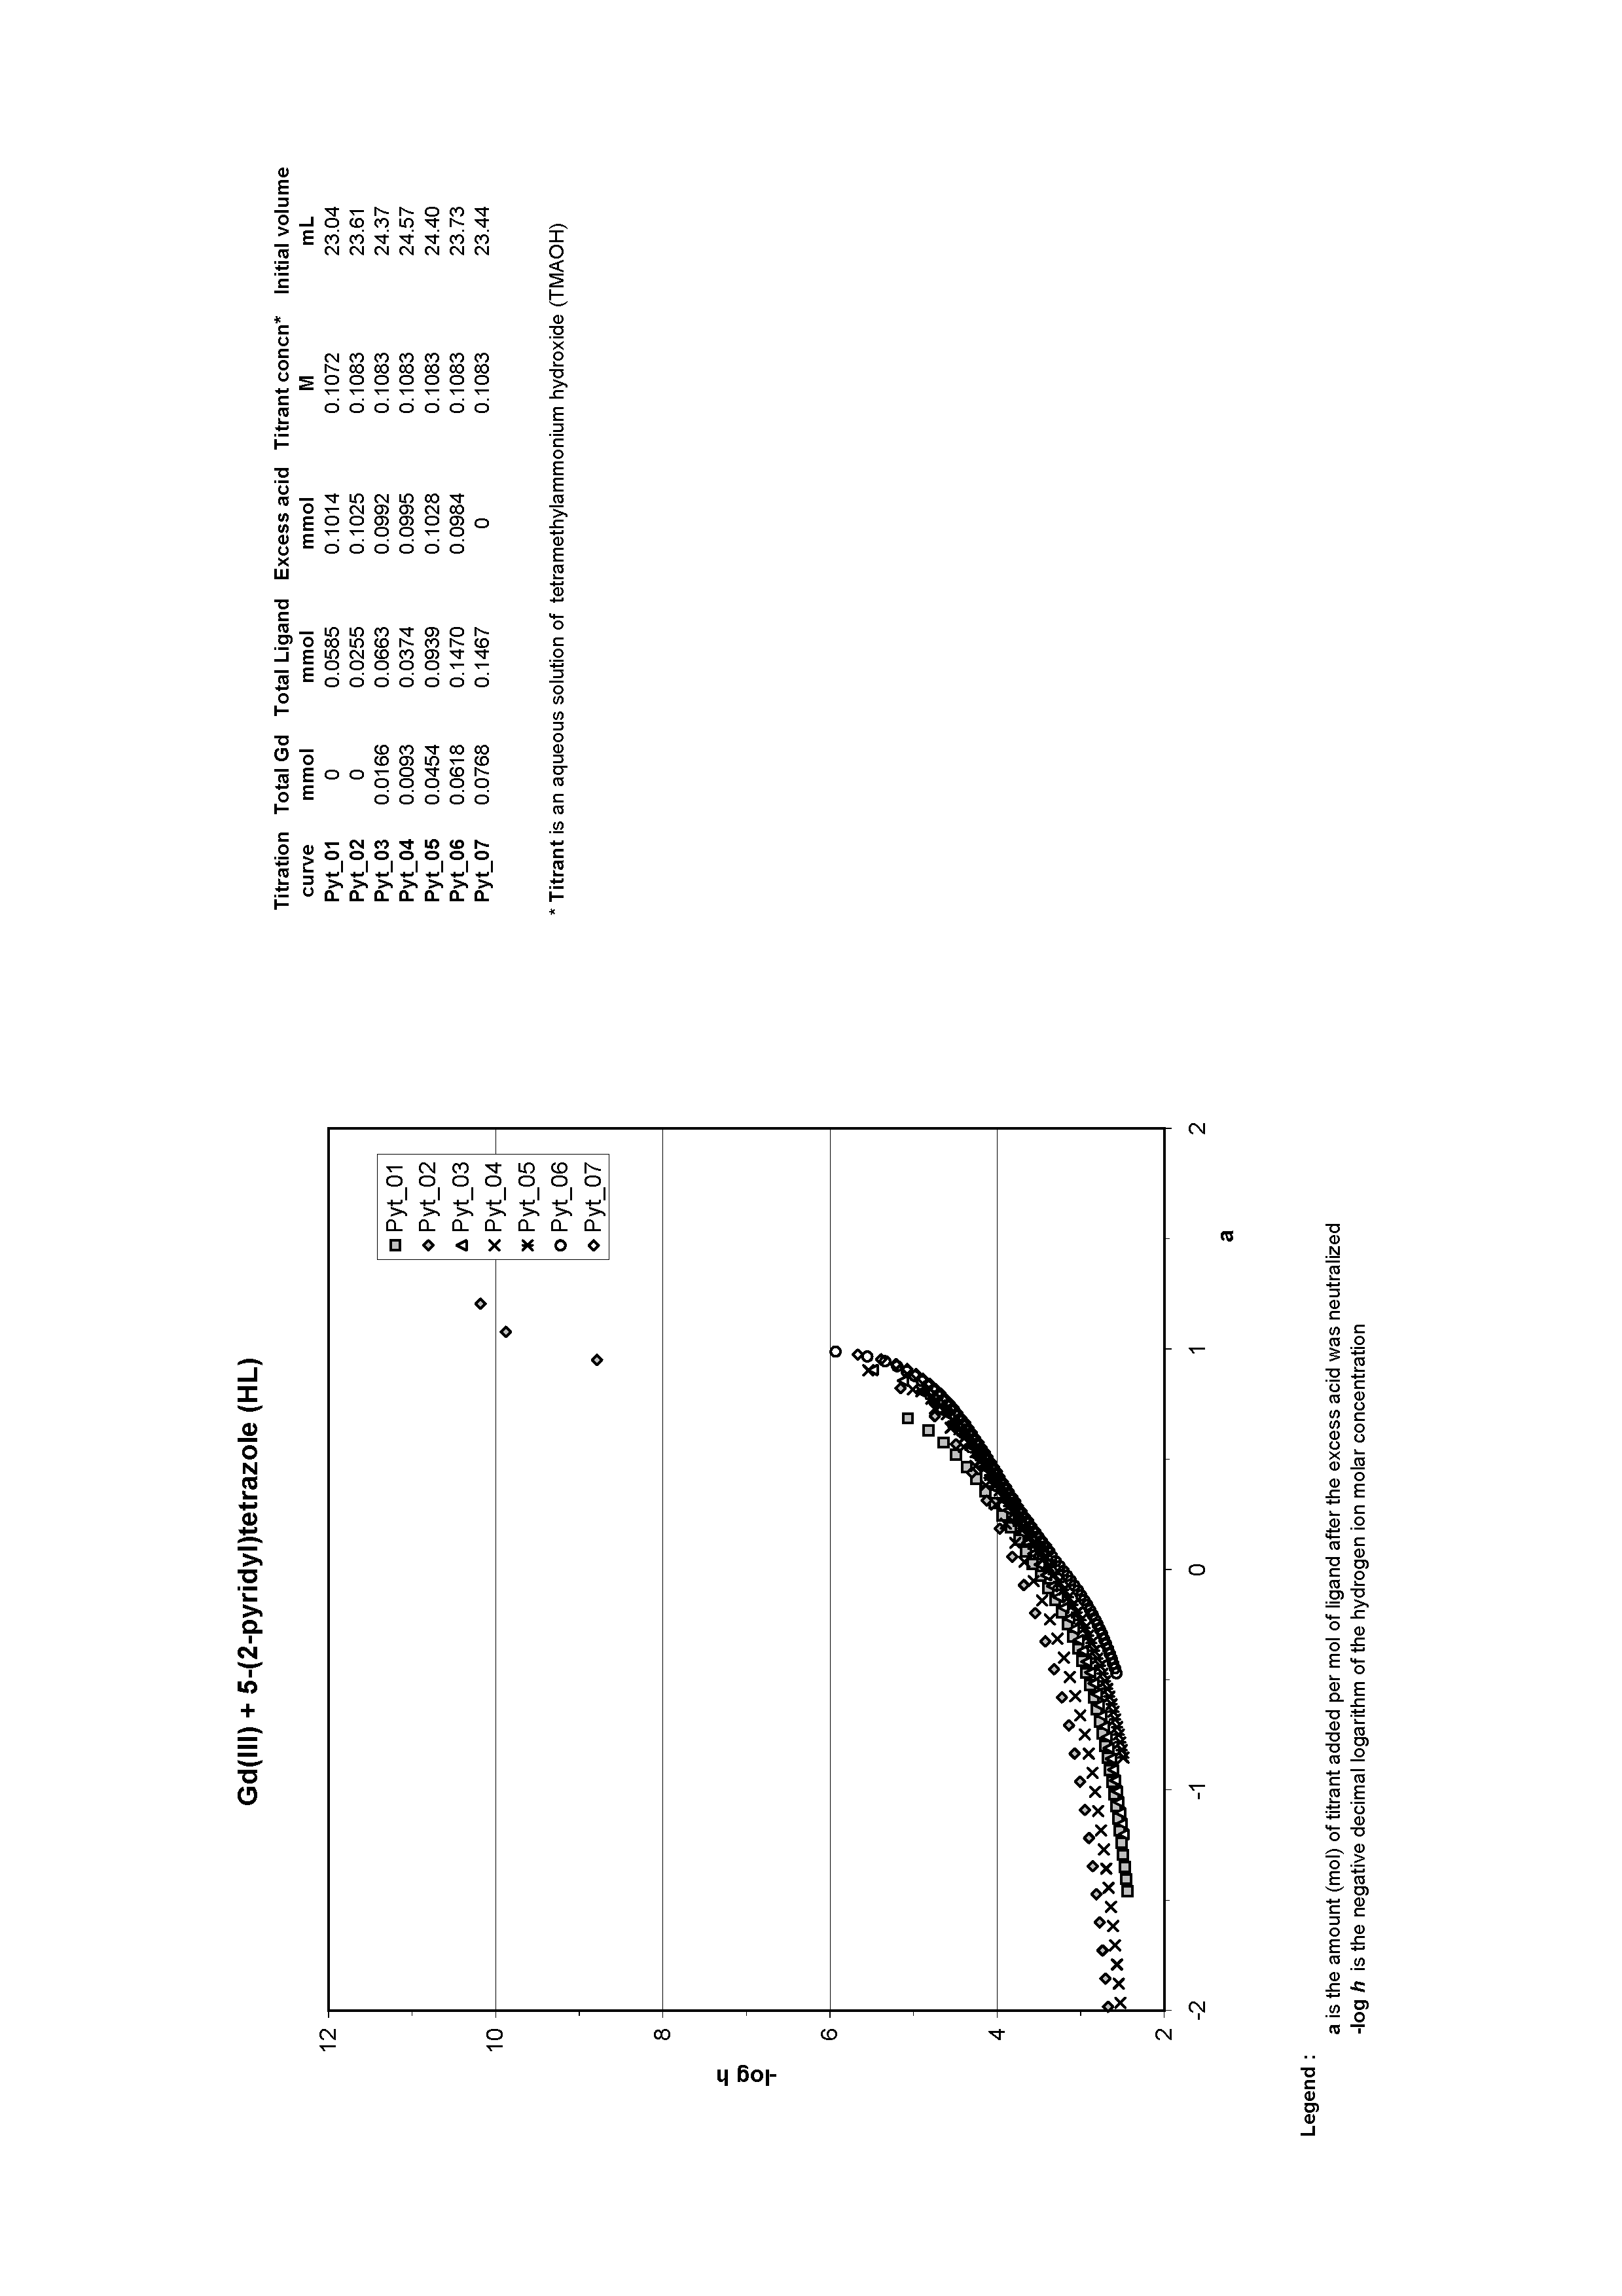


**Figure S3.** Potentiometric titration curves for ligand **1**.

**
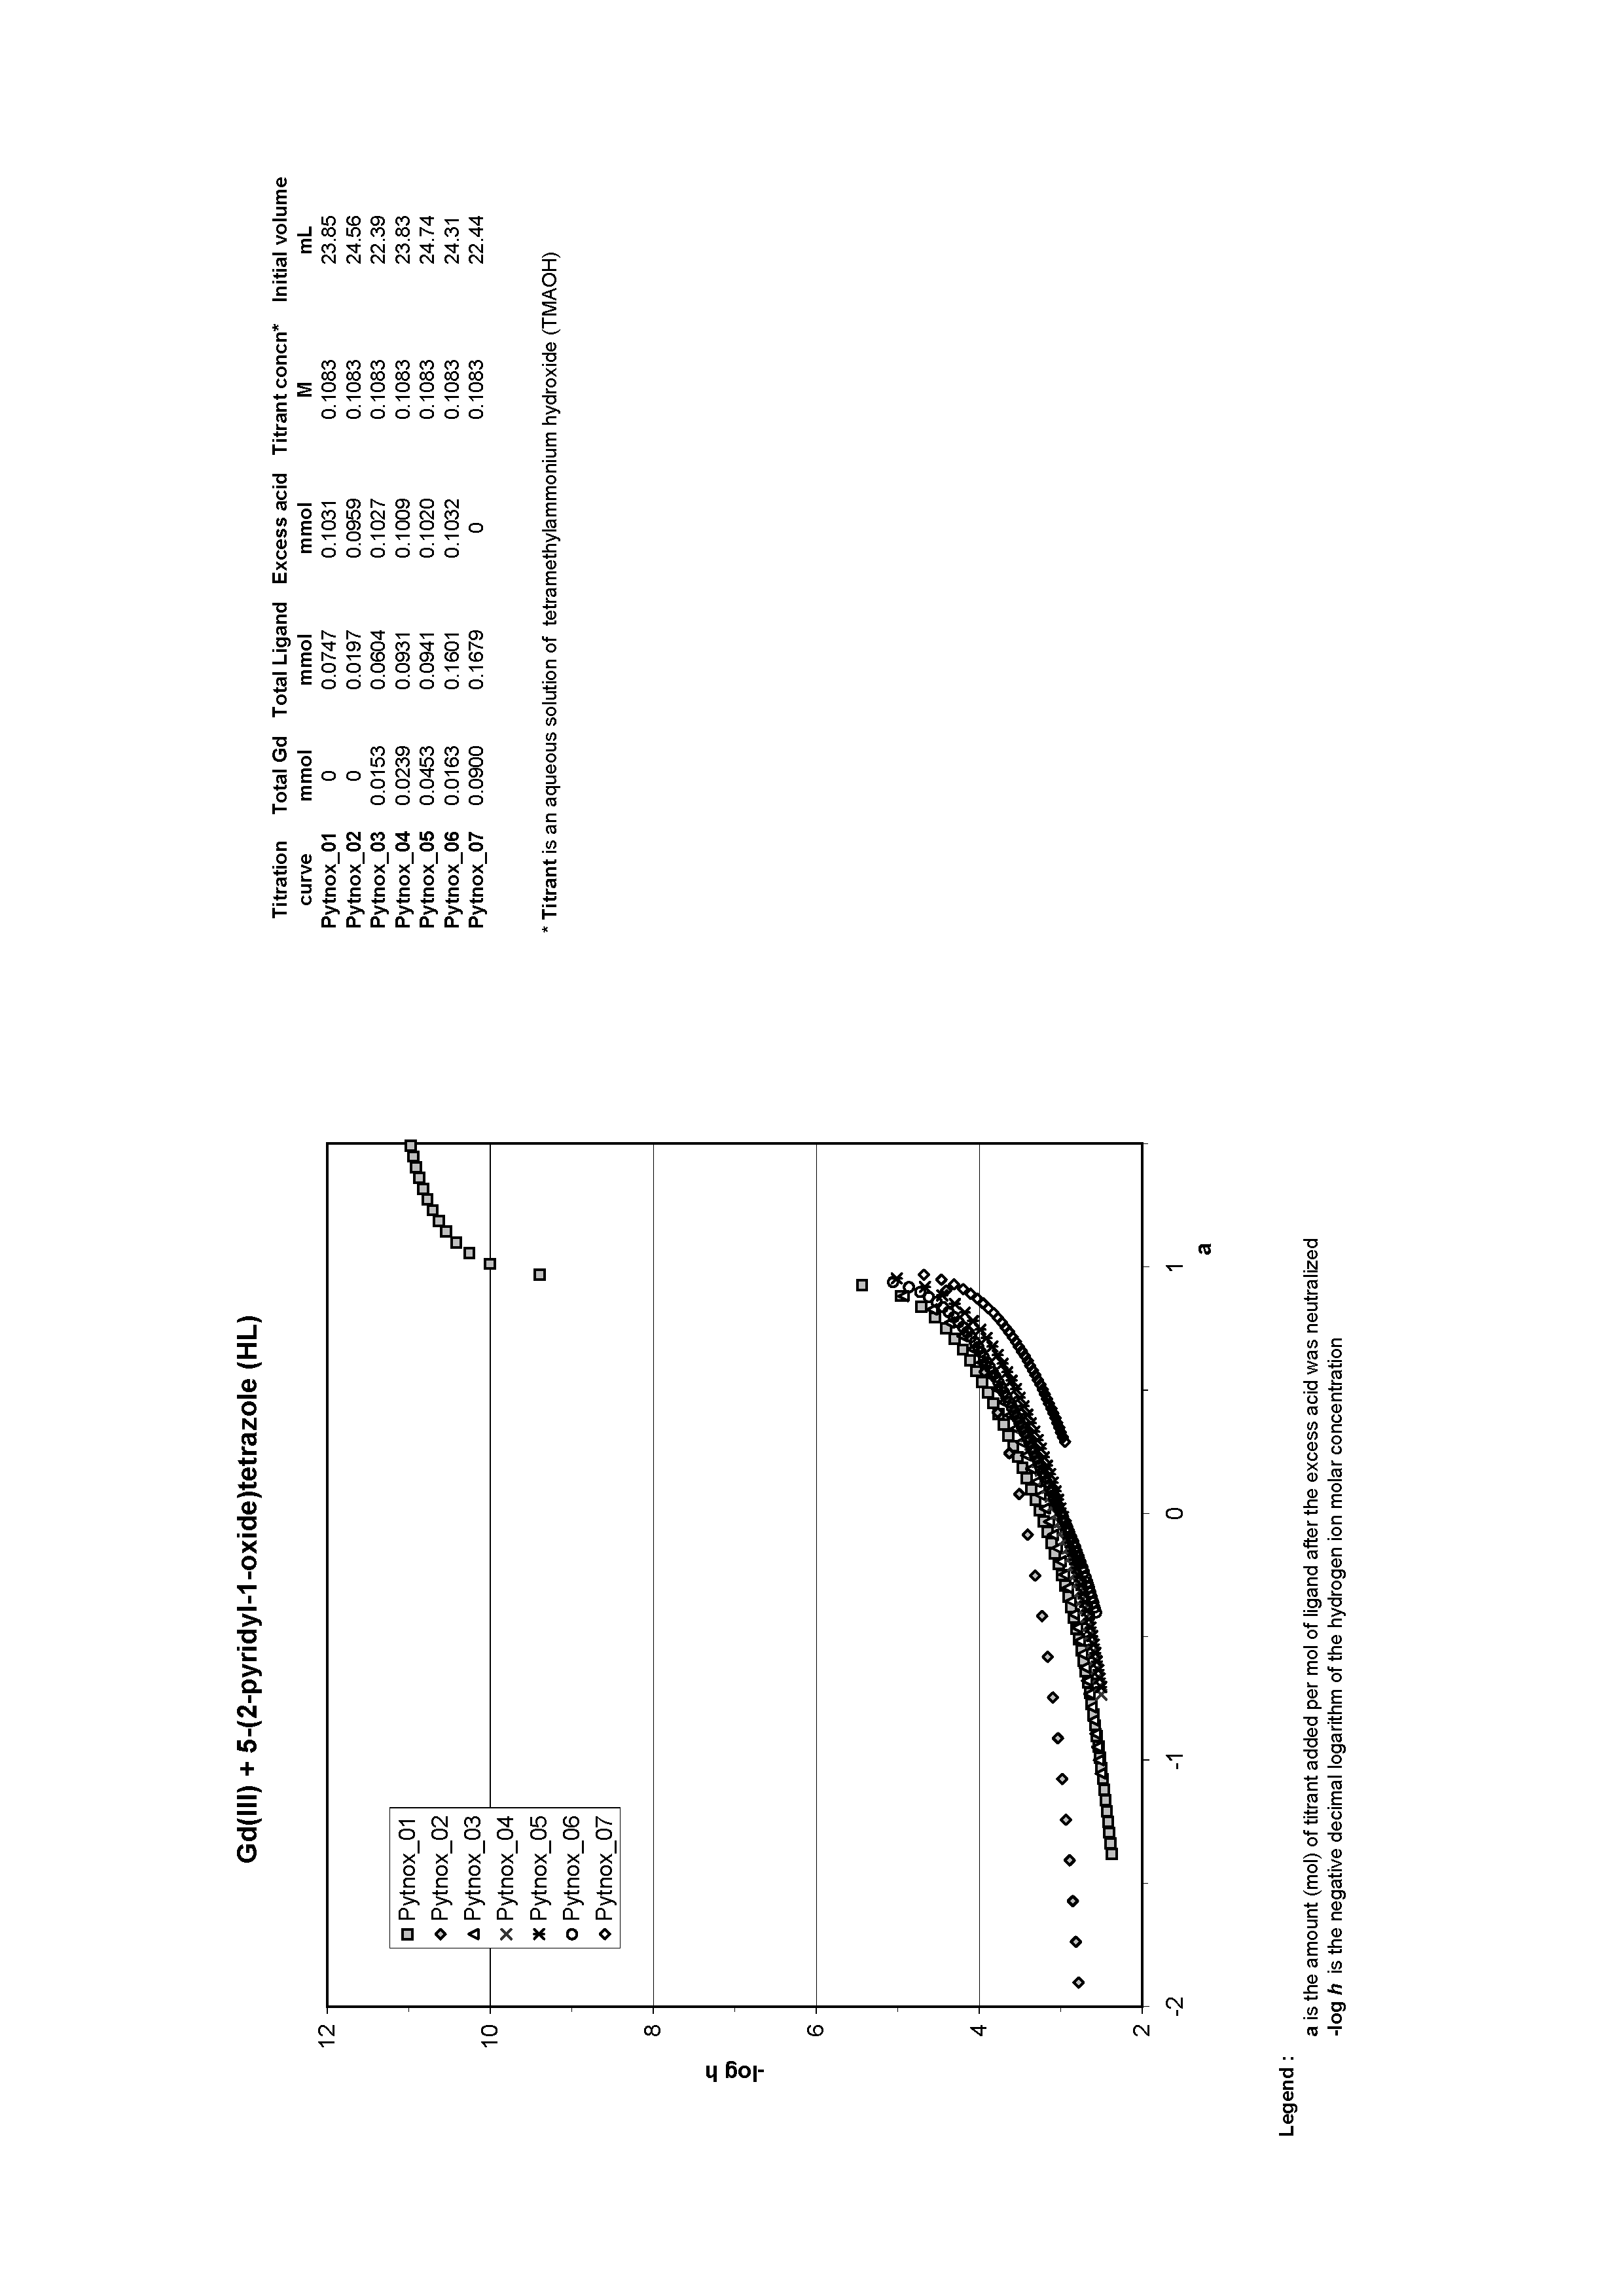
**

**Figure S4.** Potentiometric titration curves for ligand **2**.

Gd(**1**-)3

Gd(**2**-)3

Gd(**3**-)3

Gd(**4**-)3

**Figure S5.** Relaxivity plots for gadolinium chelates of **1** – **4**.
